# Supplementary material for: Evidence that human and equine erythrocytes could have significant roles in the transport and delivery of amino acids to organs and tissues
Source: PubMed Central journal article supplement (PMC7246245; doi:10.1007/s00726-020-02845-0), 2020-04-21
Supplement: 726_2020_2845_MOESM3_ESM.pdf [file 726_2020_2845_MOESM3_ESM.pdf]

Online Resource 3. Comparison of amino acid levels measured in the current study by GC-FID for horses and humans, compared with those measured in previous studies with liquid chromatography techniques.

| Amino Acid | Average concentration in Standardbred horse ( $\mu\text{M}$ ) Current study | Concentration Thoroughbred horse ( $\mu\text{M}$ ) Hanzawa and Watanabe 1991 LC Average | Average concentration in Human ( $\mu\text{M}$ ) Current study | Concentration Humans ( $\mu\text{M}$ ) Hagenfeldt and Arvidsson 1980 LC | Concentration Humans ( $\mu\text{M}$ ) Agli et al 1998 Ion exchange chromatography | Concentration Humans ( $\mu\text{M}$ ) MacLaren et al 1997 HPLC |         |
|------------|-----------------------------------------------------------------------------|-----------------------------------------------------------------------------------------|----------------------------------------------------------------|-------------------------------------------------------------------------|------------------------------------------------------------------------------------|-----------------------------------------------------------------|---------|
|            |                                                                             |                                                                                         |                                                                |                                                                         |                                                                                    | Group 1                                                         | Group 2 |
| ALA        | 275                                                                         | 450                                                                                     | 474                                                            | 256                                                                     | 448                                                                                | 1,107                                                           | 1,471   |
| ARG        |                                                                             |                                                                                         |                                                                | 19                                                                      | 42                                                                                 | 40                                                              | 19      |
| ASP        | 123                                                                         | 88                                                                                      | 79                                                             | 315                                                                     | 2,845*                                                                             | 484                                                             | 451     |
| ASN        | 82                                                                          | 68                                                                                      | 82                                                             | 127                                                                     |                                                                                    |                                                                 |         |
| CTH        | 0                                                                           |                                                                                         | 0                                                              |                                                                         | 0                                                                                  |                                                                 |         |
| GLN        | 79                                                                          |                                                                                         | 305                                                            | 466                                                                     | 592                                                                                |                                                                 |         |
| GLU        | 154                                                                         | 63                                                                                      | 118                                                            | 238                                                                     | 155                                                                                | 412                                                             | 574     |
| GLY        | 587                                                                         | 336                                                                                     | 473                                                            | 326                                                                     | 527                                                                                | 1,222                                                           | 1,589   |
| HIS        | 107                                                                         | 299                                                                                     | 41                                                             | 81                                                                      | 90                                                                                 | 342                                                             | 439     |
| ILE        | 59                                                                          | 36                                                                                      | 27                                                             | 26                                                                      | 89                                                                                 | 115                                                             | 140     |
| LEU        | 108                                                                         | 115                                                                                     | 70                                                             | 43                                                                      | 165                                                                                | 498                                                             | 608     |
| LYS        | 303                                                                         | 2660*                                                                                   | 83                                                             | 124                                                                     | 219                                                                                | 489                                                             | 648     |
| MET        | 24                                                                          |                                                                                         | 0                                                              | nd                                                                      | 28                                                                                 | 128                                                             | 186     |
| ORN        | 165                                                                         | 795                                                                                     | 109                                                            | 117                                                                     | 262                                                                                | 257                                                             | 342     |
| PHE        | 43                                                                          | 44                                                                                      | 41                                                             | 20                                                                      | 95                                                                                 | 209                                                             | 307     |
| PRO        | 318                                                                         |                                                                                         | 165                                                            | 123                                                                     |                                                                                    |                                                                 |         |
| SER        | 448                                                                         | 413                                                                                     | 163                                                            | 145                                                                     | 219                                                                                | 466                                                             | 581     |
| THR        | 331                                                                         | 467                                                                                     | 172                                                            | 103                                                                     | 216                                                                                | 352                                                             | 432     |
| TRP        | 23                                                                          |                                                                                         | 0                                                              |                                                                         | 37                                                                                 | 95                                                              |         |
| TYR        | 172                                                                         | 292                                                                                     | 78                                                             | 46                                                                      | 109                                                                                | 153                                                             | 251     |
| VAL        | 439                                                                         | 180                                                                                     | 170                                                            | 76                                                                      | 221                                                                                | 429                                                             | 582     |

\*These values appear unusually high.

## References:

Agli, A.N., A. Schaefer, B. Geny, F. Piquard, and P. Haberey. 1998. Erythrocytes participate significantly in blood transport of amino acids during the post absorptive state in normal humans. *Eur J Appl Physiol Occup Physiol.* 78:502-508.

Hagenfeldt L. and Arvidsson A. 1980. The distribution of amino acids between plasma and erythrocytes. *Clinica Chimica Acta* 100:133-141.

Hanzawa K. and Watanabe S. 1991. Free amino acid contents of horse red cells in relation to AR and BA systems: Analysis by highspeed liquid chromatography with Li-type column. *Anim. Sci. Technol. (Jpn)* 63(3):249-255.

MacLaren, D.P., A.M. Nevill, C.D. Thake, I.T. Campbell, E. Cheetham, M.A. Keegan, C. Lane, and N.B. Roberts. 2000. Human erythrocyte and plasma amino acid concentrations during exercise. *Med Sci Sports Exerc.* 32:1244-1249.
