# Supplementary material for: Evidence that human and equine erythrocytes could have significant roles in the transport and delivery of amino acids to organs and tissues
Source: PubMed Central journal article supplement (PMC7246245; doi:10.1007/s00726-020-02845-0), 2020-04-21

Online Resource 4 Figure. Coinciding uptake and release of alanine with glycine, and serine.

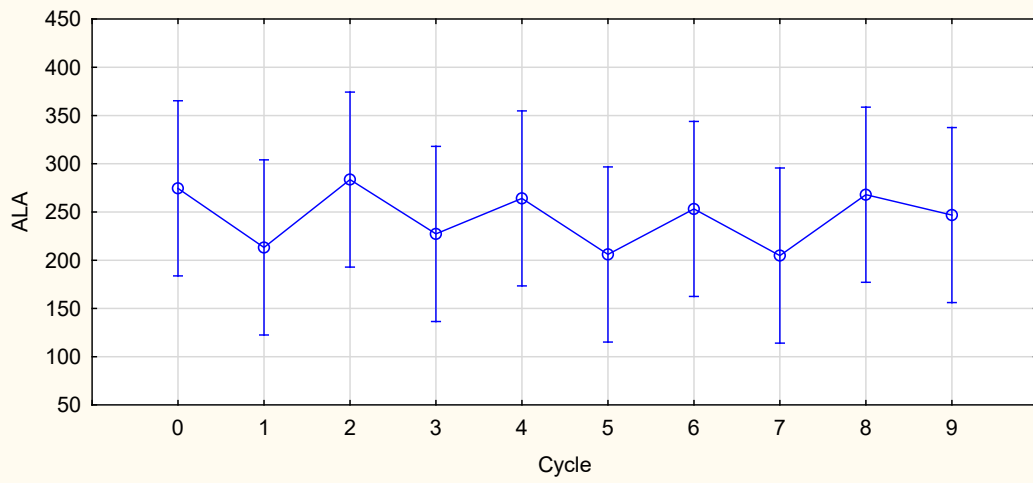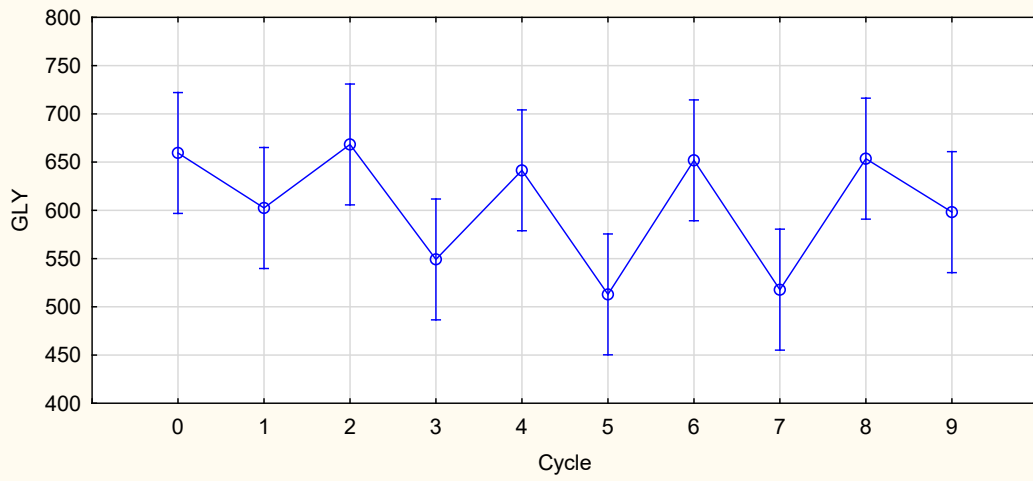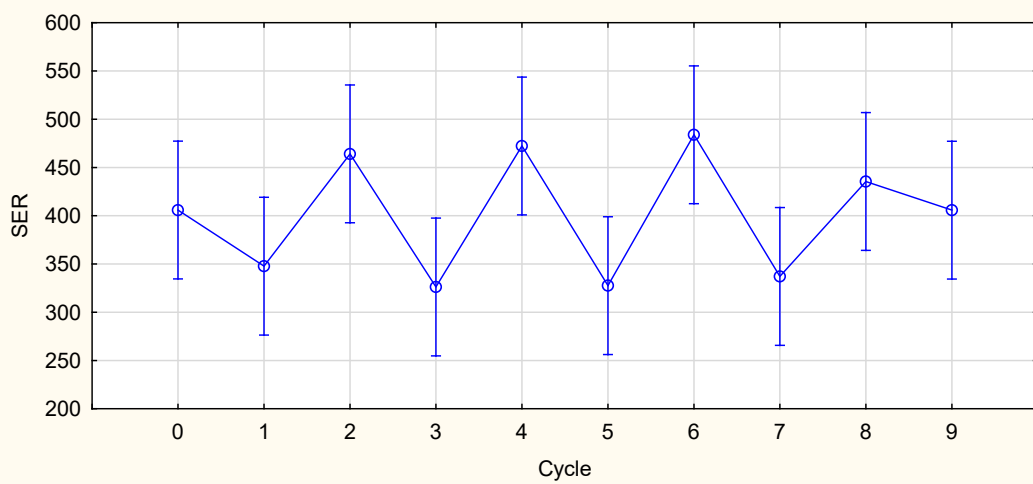

Supplement: 726_2020_2845_MOESM4_ESM.pdf [file 726_2020_2845_MOESM4_ESM.pdf]
